# Supplementary material
Source: Elsevier journal article supplement (https://comptes-rendus.academie-sciences.fr/geoscience/article/10.1016/j.crte.2018.06.005/file/attach/mmc1.pdf)
Supplement: mmc1 [file mmc1.pdf]

Supplementary table 1 : Lithostratigraphic subdivision of Ydouban Group (Reichert, 1972)/

| Formation                              | Thickness                                             | Lithological Characters                                                                                                                                                                                                                                                                                                                 |
|----------------------------------------|-------------------------------------------------------|-----------------------------------------------------------------------------------------------------------------------------------------------------------------------------------------------------------------------------------------------------------------------------------------------------------------------------------------|
| Formation V<br>of In Fereren           | > 1 500 m                                             | Sandstone to argillaceous succession<br><b>at the top</b> : friable shaly clay with rare sandstone levels.<br><b>at the bottom</b> : alternating sandstone and quartzitic sandstone with shale containing a conglomerate level.                                                                                                         |
| Formation IV<br>(In Alata)             | 400<br>to<br>< 50 m                                   | Quartzitic succession<br>Clear, fine to medium quartzites with conglomeratic levels with subordinate shaly clay intercalations.                                                                                                                                                                                                         |
| Formation III<br>of Ararous            | >1 500 m                                              | Heterogeneous succession<br>Brown friable clay and sandy shales, friable powdery sandstone, gray-black ultrafine hard quartzites, and important lenses of rocks various carbonates including calcschists to limestone and massive dolomites.                                                                                            |
| Formation II<br>of Tin Adierouf-Ekia   | 700<br>to<br>1 300 m                                  | Shale to clayey succession<br><b>at the top</b> : brown, gray, blackish, more or less ferruginous red shales, with quartzitic sandstone level.<br><b>at the bottom</b> : most often zoned, purple red shales, white, gray, blackish with significant ferruginous pigment, often more or less coaly.                                     |
| Formation Ib<br>of In Orfan-Niangay    | 1 500<br>to<br>2 000 m                                | Clayey sandstones succession<br><b>at the top</b> : yellowish brown to gray clay shale with lenticular quartzite levels<br><b>in the middle</b> : more or less calcareous shale with quartzites more or less carbonated and feldspathic<br><b>at the bottom</b> : shale with lenticular sandstone levels with interbedded conglomerates |
| Beli-Garous<br>Formation               | 500 m (Eastward)<br>Thickening up<br>towards the West | Border facies :<br>Shales with subordinate quartzitic sandstone lenses, quartzitic calcareous sandstone, limestones and lenticular dolomites increasing from East to West, intraformational breccias and conglomerates silicified rocks.                                                                                                |
| Basal formation<br>(Firgoun sandstone) | 10 to 50 m                                            | Transgression facies<br>Quartzitic sandstones and conglomerates                                                                                                                                                                                                                                                                         |
| Precambrian                            |                                                       | Major unconformity<br>Birimian basement (in the Southern part)                                                                                                                                                                                                                                                                          |
